# Supplementary material for: Identification and analysis of Chrysanthemum nankingense NAC transcription factors and an expression analysis of OsNAC7 subfamily members
Source: PeerJ. 2021 May 26;9:e11505. doi: 10.7717/peerj.11505 (PMC8164415; doi:10.7717/peerj.11505)
Supplement: Supplemental Information 8 [file peerj-09-11505-s008.xlsx]

## Sheet: Supplementary Table. 2
Supplementary Table 2 Results of physicochemical properties analysis
Gene name	Number of amino acids	Molecular weight	Theoretical pI	Aliphatic index	GRAVY
CHR00001808RA	148	16575.9	5.94	72.43	-0.427
CHR00002022RA	287	33258.5	6.56	56.72	-0.829
CHR00002389RA	350	39904.7	8.42	69.63	-0.567
CHR00003169RA	545	61088.1	4.9	69.08	-0.461
CHR00003170RA	387	43710.1	5.47	65.53	-0.726
CHR00003673RA	353	40896.7	5.23	63.51	-0.73
CHR00005907RA	306	35583.3	5.16	68.2	-0.694
CHR00007510RA	637	72797.9	8.63	60.42	-0.876
CHR00007511RA	466	53339.1	5.16	52.51	-0.881
CHR00008843RA	298	33569.3	8.86	72.21	-0.455
CHR00009869RA	399	45791.4	5.26	70.58	-0.698
CHR00009966RA	263	30405.9	5.46	65.59	-0.774
CHR00010159RA	237	27172.7	8.83	67.47	-0.908
CHR00012168RA	323	35993.6	9.04	61.02	-0.656
CHR00012660RA	263	30414.8	5.74	58.9	-0.789
CHR00012770RA	339	38142.8	8.56	55.22	-0.737
CHR00013950RA	386	43744.3	9.34	59.35	-0.695
CHR00014912RA	449	50519.4	4.61	74.21	-0.401
CHR00015109RA	191	22271	9.71	78.01	-0.38
CHR00016173RA	267	30613.8	8.36	67.27	-0.671
CHR00019831RA	434	48645	5.74	63.11	-0.703
CHR00020008RA	140	16324.4	8.66	61.29	-0.984
CHR00020260RA	239	27034.7	8.85	66.53	-0.523
CHR00020838RA	380	43645.5	6.05	62.87	-0.852
CHR00021593RA	477	54175.6	5.07	67.19	-0.654
CHR00022208RA	359	39835.1	4.95	79.53	-0.406
CHR00023476RA	406	46277.5	5.82	53.5	-0.836
CHR00024058RA	413	48081.3	4.97	53.56	-0.987
CHR00024060RA	450	52006.8	5.06	56.07	-0.909
CHR00025711RA	171	19421.9	8.93	67.78	-0.598
CHR00026420RA	327	37386.6	5.02	64.13	-0.764
CHR00026601RA	290	33981.5	8.46	62.79	-0.821
CHR00026602RA	290	34013.6	8.72	67.48	-0.766
CHR00027311RA	149	17545.7	7.77	62.21	-0.864
CHR00028332RA	277	31283.2	5.48	83.79	-0.446
CHR00030137RA	212	24375.3	8.57	51.98	-0.869
CHR00030145RA	457	51179.8	5.04	66.04	-0.734
CHR00030641RA	139	15733	6.12	80.65	-0.505
CHR00031918RA	474	53853.6	6.37	57.38	-0.952
CHR00031921RA	259	29301.9	7.71	59.11	-0.902
CHR00032377RA	175	20715.3	8.4	57.94	-0.839
CHR00035414RA	556	64241.3	5.17	60.29	-0.928
CHR00035576RA	254	29230.1	9.33	66.34	-0.698
CHR00035714RA	124	14570.8	8.76	65.16	-0.846
CHR00035830RA	264	29785.5	8.97	60.42	-0.795
CHR00035832RA	263	29654.5	9.15	62.55	-0.774
CHR00036356RA	467	53104.6	4.92	53.02	-0.917
CHR00036664RA	232	26503.9	5.84	76.03	-0.631
CHR00036983RA	216	25667	6.66	64.95	-0.859
CHR00036987RA	172	20418.2	6.84	62.85	-0.812
CHR00036993RA	352	40898.9	5.63	73.1	-0.722
CHR00037536RA	357	39970.1	5.68	68.52	-0.5
CHR00039306RA	152	17578.4	9.68	64.74	-0.59
CHR00039308RA	307	34473.1	7.83	57.82	-0.658
CHR00039885RA	295	33333.5	6.5	70.03	-0.774
CHR00039886RA	158	17801.5	9.68	69.11	-0.543
CHR00039887RA	304	34868.9	5.72	62.89	-0.836
CHR00039888RA	306	35188.4	5.43	60.88	-0.846
CHR00041483RA	282	32675.7	5.36	74.29	-0.72
CHR00041485RA	285	32548.4	5.82	64.67	-0.784
CHR00041487RA	290	33108	6.08	61.86	-0.823
CHR00041588RA	148	17345.7	9.39	65.2	-0.878
CHR00041844RA	303	34959.3	5.69	70.76	-0.663
CHR00042231RA	355	40654.1	5.28	59.58	-0.748
CHR00042500RA	396	45379.6	5.83	63.96	-0.779
CHR00043105RA	332	37197.9	8.48	57.86	-0.641
CHR00043154RA	264	29851.8	8.92	71.25	-0.745
CHR00043175RA	203	23957.4	9.07	71.53	-0.578
CHR00043953RA	358	41465.4	6.24	60.17	-0.859
CHR00044216RA	548	61306.3	5.36	64.18	-0.685
CHR00044976RA	190	21816.1	5.48	94.84	-0.257
CHR00045168RA	261	30105.1	6	60.88	-0.692
CHR00045375RA	174	20556.4	9.15	66.67	-0.824
CHR00045378RA	318	36335.2	5.03	61.67	-1.005
CHR00045380RA	456	51932.1	4.62	59.93	-0.911
CHR00045488RA	436	49922.2	5.28	53.42	-0.946
CHR00046540RA	249	28103.9	9.33	63.82	-0.725
CHR00047575RA	173	20292.5	9.97	75.95	-0.452
CHR00048081RA	371	42170.7	6.44	56.5	-0.896
CHR00048775RA	333	37919.7	6.04	62.07	-0.611
CHR00049091RA	121	14360.6	9.83	53.97	-1.01
CHR00050932RA	324	36941.5	6.09	68.24	-0.554
CHR00051526RA	562	63595.8	6.16	74.88	-0.551
CHR00051746RA	246	28155.9	8.3	64.55	-0.639
CHR00052993RA	177	20318.1	9.28	69.38	-0.563
CHR00053198RA	188	21995.4	4.83	63.72	-0.833
CHR00053493RA	382	44067.3	7.3	68.35	-0.83
CHR00054882RA	283	32822	8.33	63.04	-0.8
CHR00055022RA	271	31190.8	4.65	65.76	-0.611
CHR00055752RA	603	69741.7	4.9	56.09	-0.983
CHR00055754RA	692	80985.3	4.92	57.18	-1.001
CHR00055854RA	475	54051.8	6.39	56.02	-0.967
CHR00056274RA	599	68048.6	5.45	65.23	-0.695
CHR00056499RA	338	39218.2	6.32	57.43	-0.672
CHR00056910RA	262	29888.3	8.98	74.81	-0.576
CHR00057939RA	408	45084.4	4.85	68.6	-0.48
CHR00057945RA	245	27394.7	9.4	56.12	-0.752
CHR00058005RA	324	36712.2	8.82	56.23	-0.824
CHR00058006RA	159	18839	8.8	44.15	-1.37
CHR00058147RA	239	27498	8.92	64.06	-0.872
CHR00058150RA	167	18888.7	9.33	76.41	-0.54
CHR00058504RA	314	36525	5.93	65.19	-0.821
CHR00058506RA	233	26699.2	8.94	65.67	-0.789
CHR00058508RA	235	27408.6	5.8	58.89	-0.941
CHR00059356RA	561	62750.6	7.93	64.3	-0.626
CHR00060894RA	314	35941.1	5.72	58.98	-0.739
CHR00061617RA	386	43578.1	5.21	73.76	-0.587
CHR00061621RA	622	69555.4	4.43	70.42	-0.585
CHR00061886RA	464	53205.6	4.51	59.53	-0.918
CHR00063479RA	303	33225.3	9.18	58.32	-0.59
CHR00063731RA	628	71192.3	5.45	64.35	-0.719
CHR00067045RA	96	11210.8	8.01	70	-0.609
CHR00067396RA	204	23323.4	8.86	66.32	-0.778
CHR00068054RA	190	21878.2	9.35	63.11	-0.636
CHR00068841RA	199	23333.7	9.57	60.2	-0.734
CHR00069684RA	394	45065.2	5.74	64.31	-0.759
CHR00069706RA	341	39561.6	6.51	57.21	-0.685
CHR00069731RA	139	16509.7	9.34	58.92	-1.036
CHR00069734RA	267	30823.7	8.8	65.39	-0.953
CHR00072064RA	364	40003.5	5.82	58.08	-0.546
CHR00073261RA	216	25485.9	9.5	58.19	-0.943
CHR00074004RA	68	7787.81	9.16	54.56	-0.693
CHR00074005RA	269	30673.5	6.49	65.28	-0.684
CHR00074006RA	224	25982.2	10.08	78.75	-0.521
CHR00074007RA	237	27300.7	9.91	85.91	-0.411
CHR00074235RA	281	32274	5.93	60	-0.721
CHR00074451RA	138	16345.5	7.06	76.16	-0.69
CHR00076244RA	190	21878.2	9.35	63.11	-0.636
CHR00079141RA	330	37220.8	8.95	57.33	-0.721
CHR00079376RA	439	50250.1	6.13	60.57	-0.862
CHR00081337RA	201	23312.3	6.8	68.86	-0.761
CHR00081338RA	222	25374.4	6.07	65	-0.783
CHR00081339RA	306	34914.4	6.56	64.67	-0.744
CHR00081941RA	393	45123.8	6.38	63.54	-0.946
CHR00082139RA	273	31184.8	5.84	51.79	-0.774
CHR00082782RA	169	19492.6	9.81	85.92	-0.33
CHR00083809RA	389	43807.8	5.27	62.65	-0.76
CHR00085163RA	233	26954.1	5.4	56.87	-0.81
CHR00085929RA	309	34836.5	5.08	58.77	-0.876
CHR00086687RA	135	15665.2	9.52	75.78	-0.422
CHR00087382RA	114	13209.3	9.64	67.54	-0.562
CHR00087383RA	156	18182.3	9.68	70.58	-0.544
CHR00088453RA	693	80582.8	4.84	56.96	-0.961
CHR00088969RA	199	22851.2	4.71	61.66	-0.735
CHR00089260RA	466	53214.9	5.27	53.13	-0.928
CHR00089562RA	334	37894.4	8.75	60.42	-0.71
CHR00089563RA	261	29139.8	8.9	62.41	-0.744
CHR00089784RA	320	35380.6	6.09	61.5	-0.46
CHR00089997RA	279	31504.1	6.79	80.75	-0.466
CHR00091610RA	318	35177.5	5.38	69.56	-0.639
CHR00093217RA	322	36803.6	6.06	72.95	-0.564
CHR00093218RA	126	14446.7	10.2	64.21	-0.906
CHR00093234RA	277	31507.2	9.88	65.85	-0.83
Average:	307.987	35195.1	7.08549	64.5814	-0.728961
